# Supplementary material for: PreclinicalIn VitroandIn VivoEvaluation of [18F]FE@SUPPY for Cancer PET Imaging: Limitations of a Xenograft Model for Colorectal Cancer
Source: Hindawi journal article supplement (doi:10.1155/2018/1269830), 2018-01-01
Supplement: f1 [file 1269830.f1.pdf]

## Supplementary

| sample    |          | Colorectal cancer | Healthy colon | P value | ratio |
|-----------|----------|-------------------|---------------|---------|-------|
| Patient 1 | Region 1 | 7.0 ± 3.6         | 3.1 ± 0.6     | < 0.05  | 2.3   |
|           | Region 2 | 9.9 ± 1.1         | 4.1 ± 1.2     | < 0.01  | 2.4   |
|           | Region 3 | 12.2 ± 2.8        | 4.4 ± 1.2     | < 0.01  | 2.8   |
|           | Region 4 | 7.6 ± 2.3         | 2.3 ± 0.9     | < 0.01  | 3.3   |
| Patient 2 | Region 1 | 8.6 ± 0.8         | 3.4 ± 0.2     | < 0.01  | 2.5   |
|           | Region 2 | 8.5 ± 0.9         | 6.6 ± 1.7     | ns      | 1.3   |
|           | Region 3 | 25.0 ± 2.6        | 15.6 ± 0.5    | < 0.05  | 1.6   |

Table S1: Binding values (mean ± SD, n=3-9) of [<sup>18</sup>F]FE@SUPPY are expressed as fmol/mm<sup>2</sup> tissue.
